# Supplementary material for: Molecular insights into the Darwin paradox of coral reefs from the sea anemone Aiptasia
Source: PubMed Central journal article supplement (PMC10017044; doi:10.1126/sciadv.adf7108), 2023-03-15
Supplement: sciadv.adf7108_sm.pdf [file sciadv.adf7108_sm.pdf]

Supplementary Materials for

**Molecular insights into the Darwin paradox of coral reefs from the sea anemone *Aiptasia***

Guoxin Cui *et al.*

Corresponding author: Guoxin Cui, [guoxin.cui@kaust.edu.sa](mailto:guoxin.cui@kaust.edu.sa); Manuel Aranda, [manuel.aranda@kaust.edu.sa](mailto:manuel.aranda@kaust.edu.sa)

*Sci. Adv.* **9**, eadf7108 (2023)  
DOI: 10.1126/sciadv.adf7108

**The PDF file includes:**

Fig. S1 to S10  
Table S1 to S20  
Legends for data S1 to S5

**Other Supplementary Material for this manuscript includes the following:**

Data S1 to S5

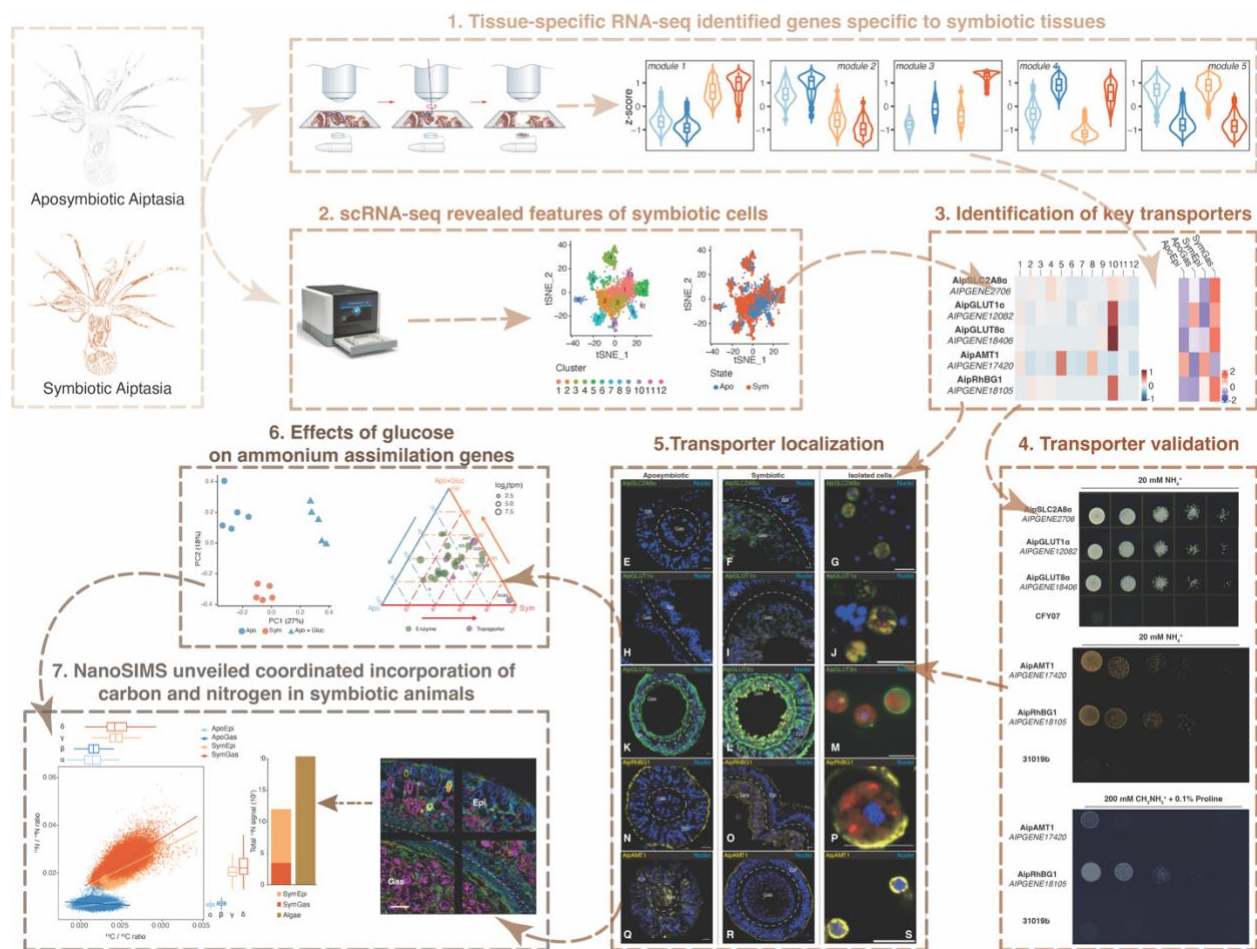

**Fig. S1. Summary of the study.** Using aposymbiotic and symbiotic anemones, we performed laser-microdissection-assisted tissue-specific transcriptomic profiling and identified gene modules associated with the symbiotic tissue layer (1). To further examine symbiosis-induced gene expression changes at the single-cell level, we conducted single-cell RNA-seq (2). Combined tissue-specific and scRNA-seq data highlighted five key symbiosis-associated nutrient transporters (3). Using yeast mutant rescue experiments, we verified and characterized the function of these transporters (4). Immunofluorescence staining showed that the expression and localization of these transporters are altered by symbiosis (5). Relocalization and expression changes were joint effects of increased glucose availability and the presence of the symbiont (6). The combined data suggested a promoted co-incorporation of carbon and nitrogen in symbiotic animals, which was confirmed through NanoSIMS analysis of  $^{13}\text{C}$  and  $^{15}\text{N}$  labeling experiments (7).

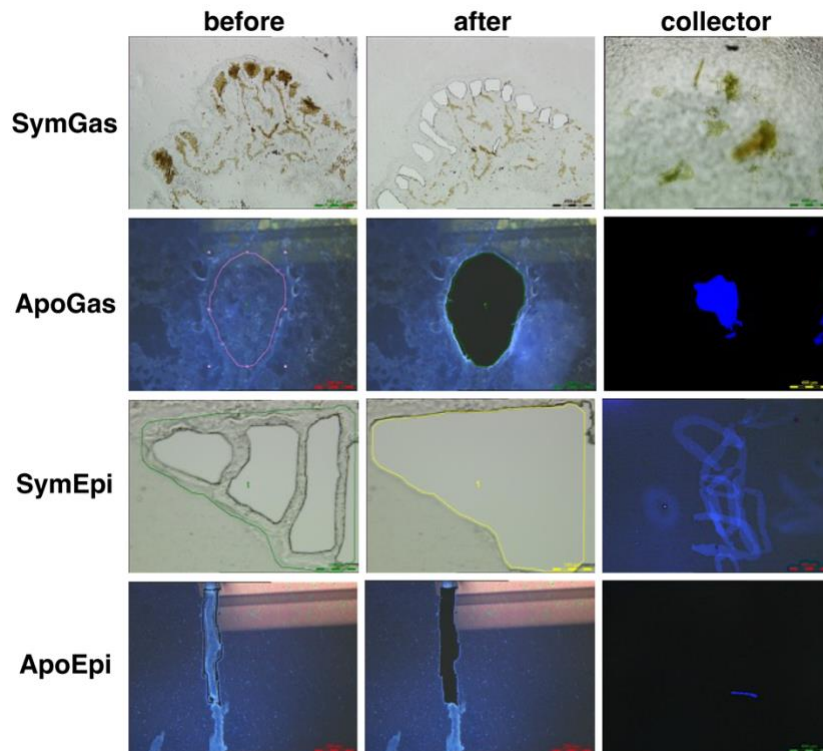

**Fig. S2. Laser microdissection (LMD) of symbiotic and aposymbiotic *Aiptasia*.** Symbiotic samples were imaged under white light, whereas aposymbiotic samples were visualized using a Leica filter cube B/G/R or A, which helped in identifying their epidermal cell layer. Sym, symbiotic; Apo, aposymbiotic; Gas, gastrodermis; Epi, epidermis. Brightness and contrast were adjusted for the collector images to increase the visibility of the tissues collected.

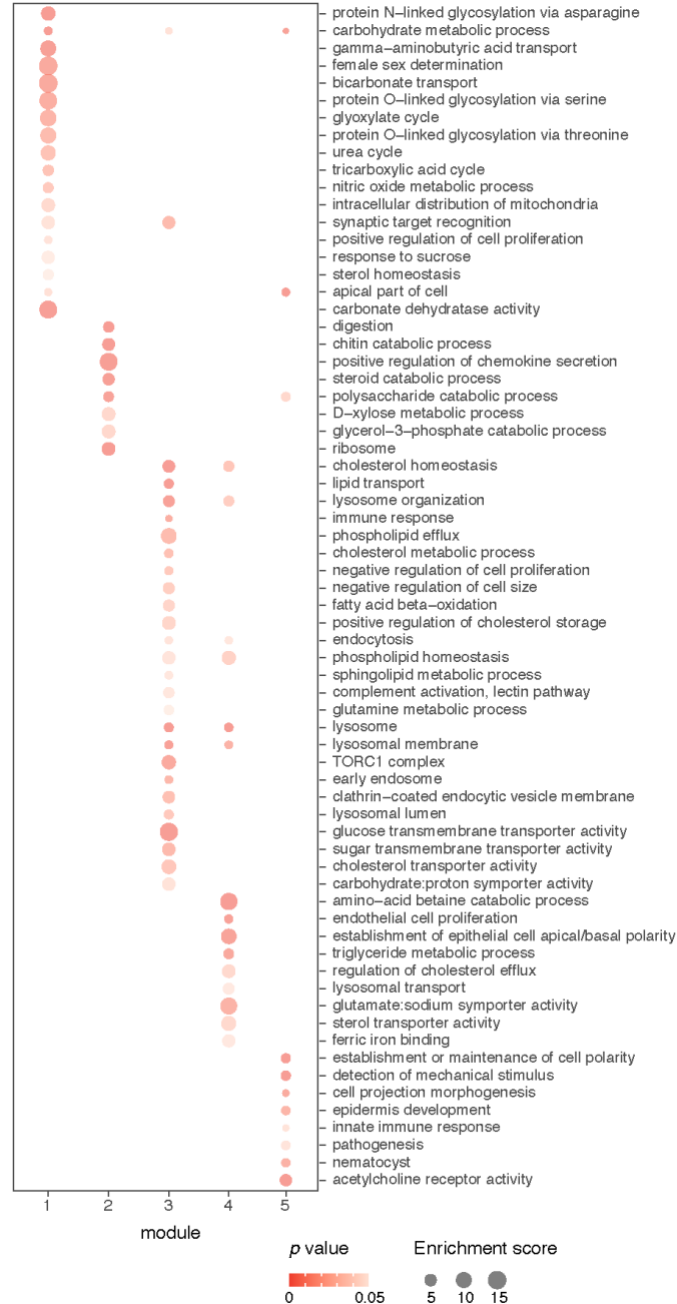

**Fig. S3. Gene-ontology (GO) terms enriched by the genes in each of the five modules identified from multi-factorial differential-expression analysis (Fig. 1C).** The size of each dot represents the enrichment score that was calculated by dividing the actual by the expected number of DEGs associated with the corresponding term.

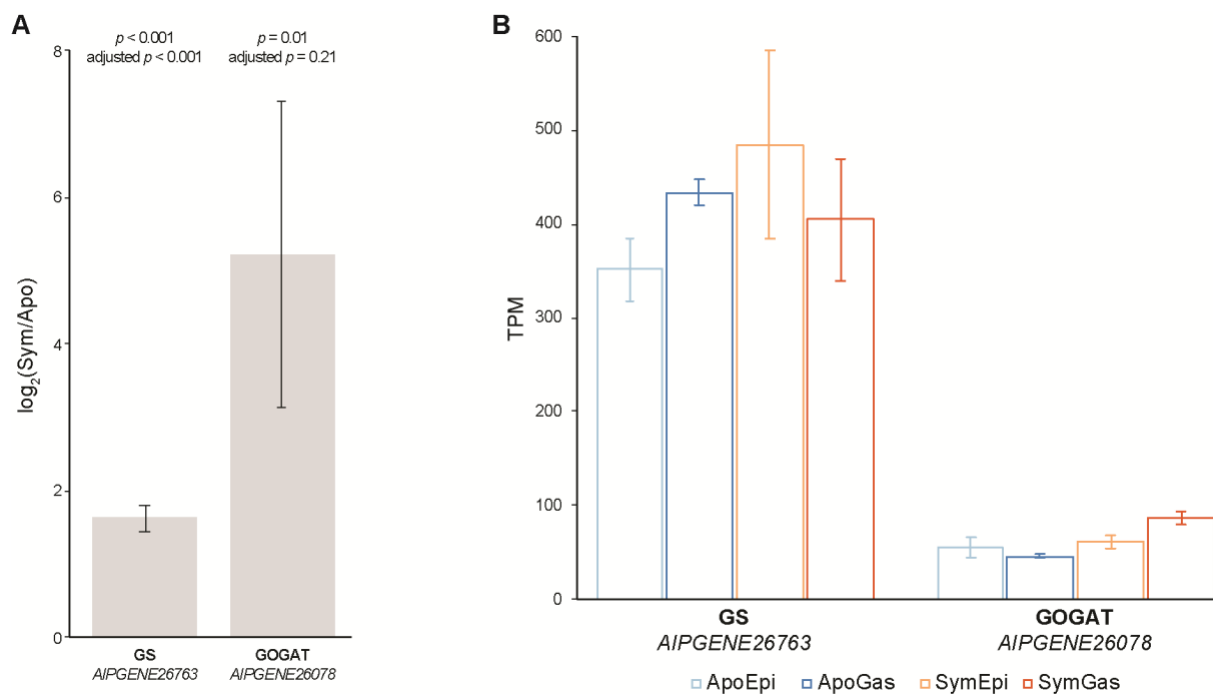

**Fig. S4. Expression patterns of key genes associated with ammonium assimilation at organism (A) and tissue (B) levels.** Organism-level data in (A) were extracted from Cui et al. (15). GS, glutamine synthetase; GOGAT, glutamate synthase. Error bars represent mean  $\pm$  SE.

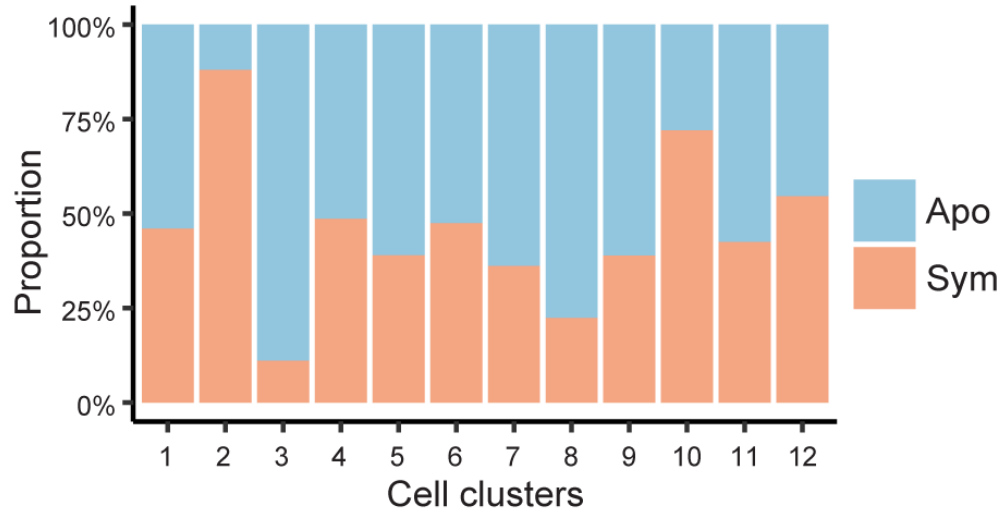

**Fig. S5. Proportions of cells originating from aposymbiotic or symbiotic anemones in the 12 clusters identified by single-cell RNA-Seq (see Fig. 1, D and E). Apo, aposymbiotic; Sym, symbiotic.**

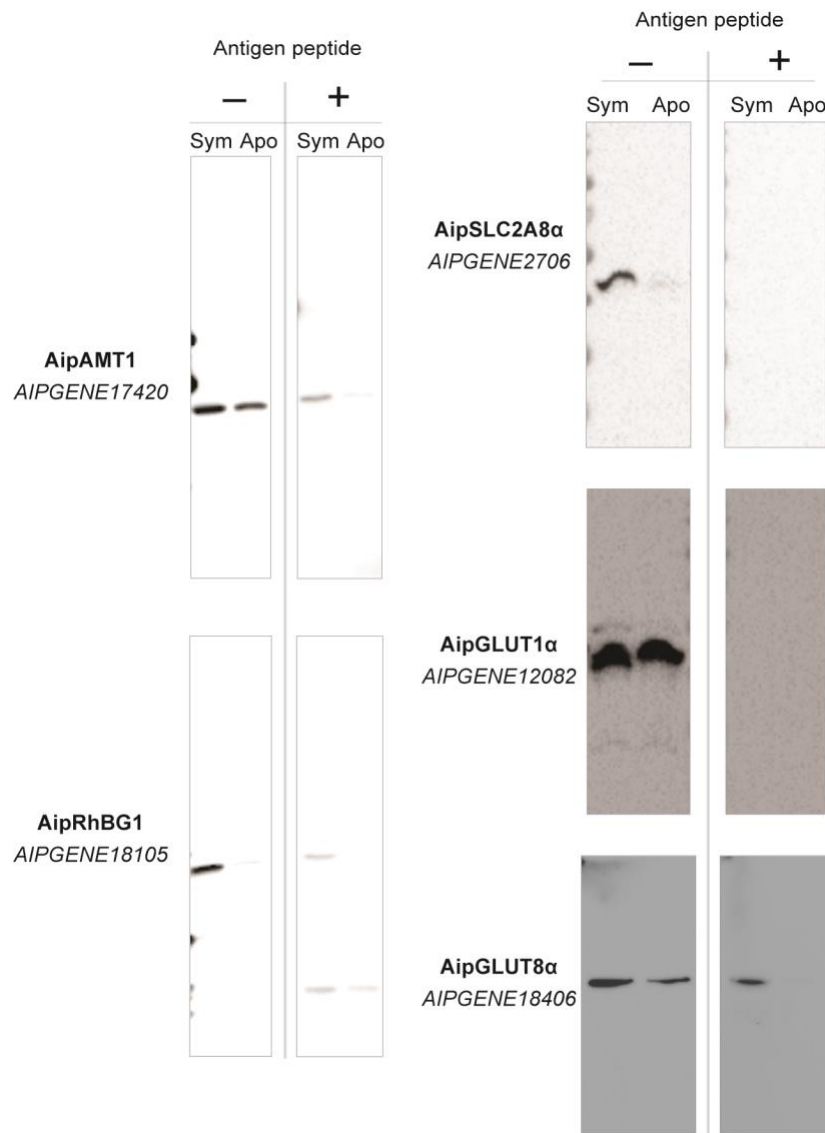

**Fig. S6. Western-blot validation of the custom antibodies.** 10  $\mu$ g (for AipAMT1 and AipRhBG1), 15  $\mu$ g (for AipGLUT8 $\alpha$ ), or 20  $\mu$ g (for AipSLC2A8 $\alpha$  and AipGLUT1 $\alpha$ ) of total protein isolated from symbiotic (Sym) or aposymbiotic (Apo) anemones were resolved on SDS-PAGE gels and transferred onto PVDF membranes. The membranes were incubated either with only the appropriate antibody (-) or with the appropriate antibody pre-absorbed with its antigen peptide (+). Further details are in Materials and Methods.

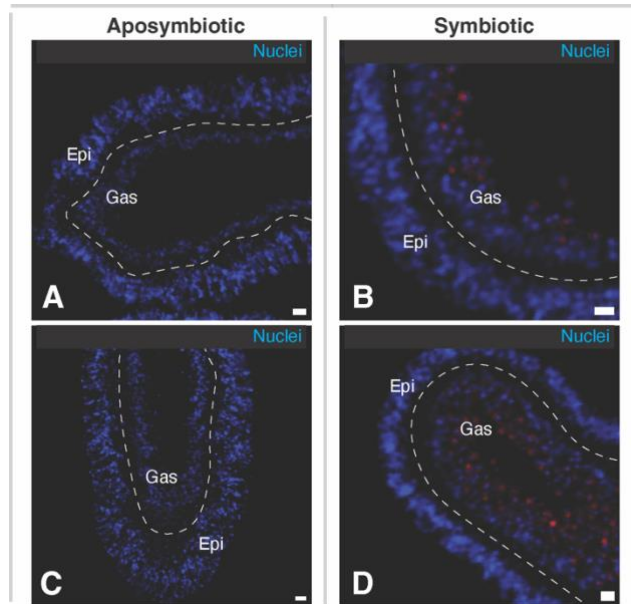

**Fig. S7. Immunofluorescence staining of aposymbiotic (A, C) and symbiotic (B, D) Aiptasia with only the secondary antibodies: Alexa Fluor 488-conjugated goat anti-mouse-IgG (A, B); Alexa Fluor 555-conjugated goat anti-rabbit-IgG (C, D). The images shown are representative of many such cells observed. Scale bars (all panels), 10  $\mu$ m.**



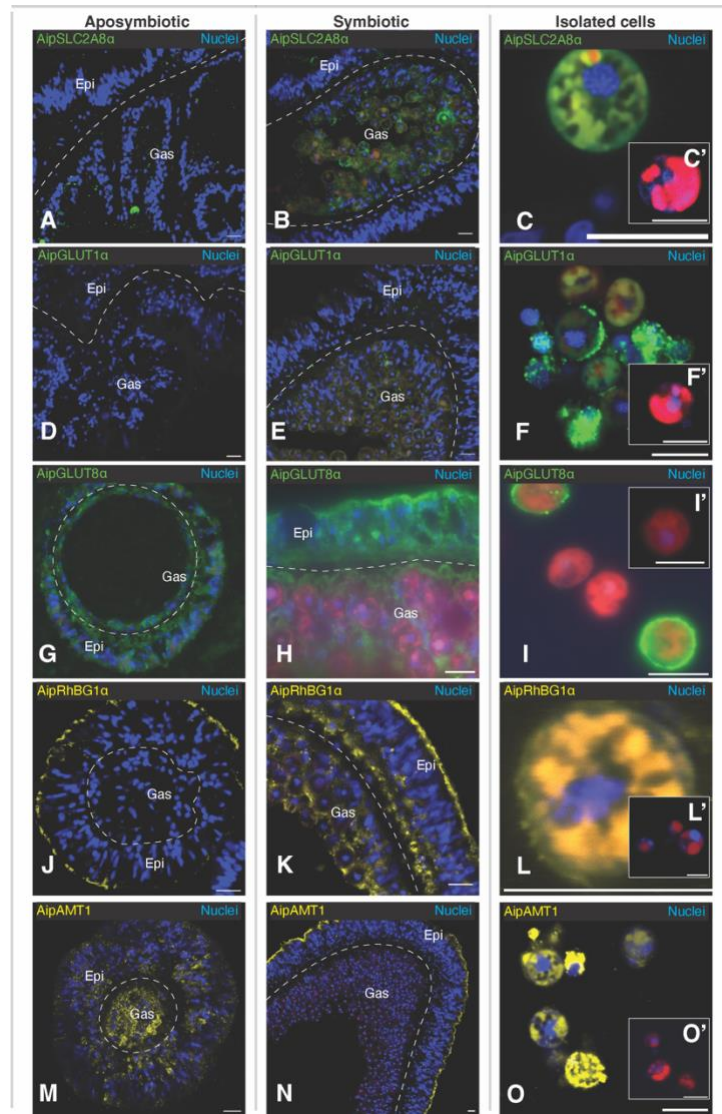

**Fig. S8. Additional immunofluorescence images (as in Fig. 2, E – S) showing relocalization of glucose (A – I) and ammonium (J – O) transporters induced by symbiosis.** Tissue sections of aposymbiotic (A, D, G, J, M) and symbiotic (B, E, H, K, N) anemones are shown along with cells isolated from symbiotic animals (C, F, I, L, O) and cultured algal cells (strain SSB01; C', F', I', L', O'). The image shown is representative of many such tissue sections and cells observed. Scale bars (all panels), 10  $\mu$ m.

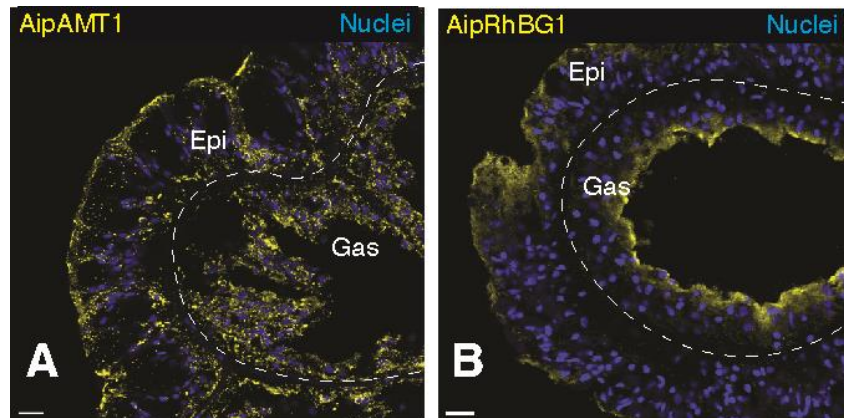

**Fig. S9.** Additional images showing localization patterns of ammonium transporters AipAMT1 (A) and AipRhBG1 (B) in glucose-treated aposymbiotic Aiptasia (see Fig. 3 C and D). Scale bars (both panels), 10  $\mu$ m.

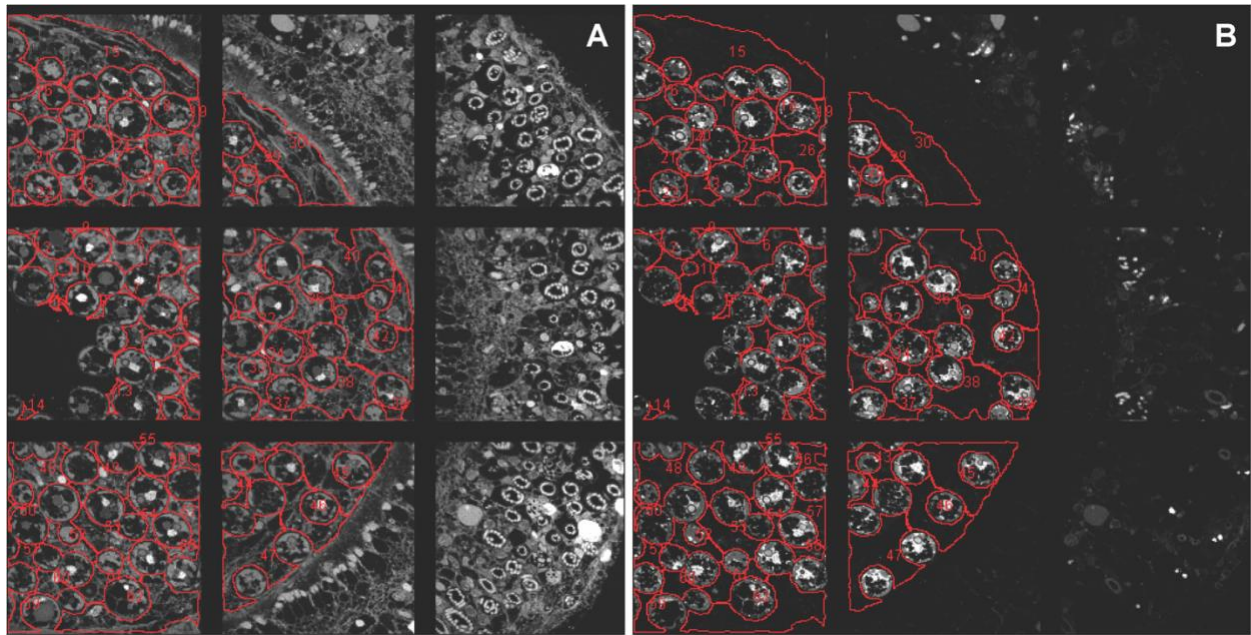

**Fig. S10. Representative regions of interest (ROI; numbered red outlines) in the gastrodermis displayed for (A)  $^{14}\text{N}$  and (B)  $^{15}\text{N}$ . The ROI were drawn manually to include only gastrodermal tissue and not algal-symbiont cells.**

**Table S1 Module 1 genes involved in carbon cycling and carbohydrate metabolism**

| Gene ID <sup>a,b</sup> | Average expression level (TPM) <sup>c</sup> |            | Fold change <sup>c</sup> |               | Annotation                                                           |
|------------------------|---------------------------------------------|------------|--------------------------|---------------|----------------------------------------------------------------------|
|                        | SymEpi                                      | SymGas     | SymEpi/ApoEpi            | SymGas/ApoGas |                                                                      |
| <b>AIPGENE17854</b>    | <b>51</b>                                   | <b>110</b> | <b>2.4</b>               | <b>6.0</b>    | <b>Isocitrate lyase</b>                                              |
| AIPGENE21331           | 85                                          | 220        | 1.3                      | 5.7           | Carnitine O-palmitoyltransferase 1                                   |
| AIPGENE15469           | 39                                          | 53         | 1.5                      | 5.4           | Carbonic anhydrase 7                                                 |
| AIPGENE6376            | 59                                          | 76         | 3.4                      | 4.5           | Phosphorylase b kinase gamma catalytic chain PHKG2                   |
| AIPGENE2308            | 40                                          | 56         | 1.6                      | 4.2           | Polypeptide N-acetylgalactosaminyltransferase 1                      |
| <b>AIPGENE12054</b>    | <b>26</b>                                   | <b>31</b>  | <b>1.9</b>               | <b>3.7</b>    | <b>Glucose transporter type 1</b>                                    |
| AIPGENE12939           | 15                                          | 26         | 1.6                      | 3.7           | Alpha-N-acetylgalactosaminidase NAGA                                 |
| AIPGENE9860            | 50                                          | 53         | 2.8                      | 3.6           | [Pyruvate dehydrogenase (acetyl-transferring)] kinase isozyme 2 PDK2 |
| AIPGENE8506            | 25                                          | 34         | 2.0                      | 3.0           | Solute carrier family 26 member 6 SLC26A6                            |
| AIPGENE21162           | 19                                          | 24         | 1.6                      | 2.9           | Carbohydrate sulfotransferase 1                                      |
| AIPGENE1116            | 19                                          | 30         | 1.8                      | 2.7           | N-acetylglucosamine-6-phosphate deacetylase amdhd2                   |
| <b>AIPGENE17843</b>    | <b>50</b>                                   | <b>64</b>  | <b>2.6</b>               | <b>2.6</b>    | <b>Malate synthase</b>                                               |
| AIPGENE24851           | 70                                          | 82         | 1.4                      | 2.4           | Serine/threonine-protein kinase/endoribonuclease IRE1A               |
| AIPGENE12778           | 49                                          | 68         | 1.3                      | 2.2           | Galactokinase GALK1                                                  |
| AIPGENE5850            | 53                                          | 50         | 1.1                      | 1.9           | Capsule biosynthesis protein CapA                                    |
| AIPGENE6132            | 20                                          | 22         | 2.1                      | 1.8           | Lysosomal alpha-mannosidase                                          |
| AIPGENE3057            | 62                                          | 69         | 1.8                      | 1.7           | Pyruvate carboxylase                                                 |
| AIPGENE22466           | 27                                          | 32         | 1.5                      | 1.7           | UDP-glucose:glycoprotein glucosyltransferase 1                       |
| AIPGENE18740           | 36                                          | 41         | 1.6                      | 1.6           | Neutral alpha-glucosidase AB                                         |
| AIPGENE25712           | 34                                          | 18         | 4.1                      | 1.4           | Di-N-acetylchitobiase CTBS                                           |
| AIPGENE28157           | 110                                         | 62         | 2.1                      | 1.3           | Carbamoyl-phosphate synthase [ammonia] CPS1                          |

<sup>a</sup> Ordered by SymGas/ApoGas.

<sup>b</sup> Gray highlight, a gene encoding a putative glucose transporter that is upregulated in both gastrodermal and epidermal cells of symbiotic animals but not investigated further in this study; yellow highlight, genes encoding glyoxylate-cycle enzymes.

<sup>c</sup> Numbers are rounded to two significant digits.

**Table S2 Module 1 genes involved in nitrogen cycling and serine/glycine biosynthesis**

| Gene ID <sup>a,b</sup> | Average expression level (TPM) <sup>c</sup> |        | Fold change <sup>c</sup> |               | Annotation                                  |
|------------------------|---------------------------------------------|--------|--------------------------|---------------|---------------------------------------------|
|                        | SymEpi                                      | SymGas | SymEpi/ApoEpi            | SymGas/ApoGas |                                             |
| AIPGENE18105           | 20                                          | 410    | 6.8                      | 170           | Ammonium transporter Rh type B              |
| AIPGENE18835           | 26                                          | 28     | 2.0                      | 3.7           | Glycine N-methyltransferase GNMT            |
| AIPGENE22717           | 48                                          | 72     | 2.4                      | 3.1           | Serine-pyruvate aminotransferase AGXT       |
| AIPGENE18470           | 27                                          | 23     | 1.7                      | 1.8           | Argininosuccinate synthase                  |
| AIPGENE28157           | 110                                         | 62     | 2.1                      | 1.3           | Carbamoyl-phosphate synthase [ammonia] CPS1 |

<sup>a</sup> Ordered by SymGas/ApoGas.

<sup>b</sup> Gray highlight, a gene encoding an ammonium transporter (AipRhBG1) that is investigated further in this study.

<sup>c</sup> Numbers are rounded to two significant digits.

**Table S3 Module 1 genes involved in post-translational modification**

| Gene ID <sup>a,b</sup> | Average expression level (TPM) <sup>c</sup> |        | Fold change <sup>c</sup> |               | Annotation                                                           |
|------------------------|---------------------------------------------|--------|--------------------------|---------------|----------------------------------------------------------------------|
|                        | SymEpi                                      | SymGas | SymEpi/ApoEpi            | SymGas/ApoGas |                                                                      |
| <b>AIPGENE130</b>      | 45                                          | 100    | 2.4                      | 4.6           | Alpha-1,3-Glucosyltransferase ALG8                                   |
| AIPGENE16395           | 28                                          | 26     | 1.5                      | 3.8           | Low-salt glycan biosynthesis protein Agl12                           |
| <b>AIPGENE8406</b>     | 29                                          | 17     | 2.0                      | 2.5           | Polypeptide N-acetylgalactosaminyltransferase 1 GALNT1               |
| AIPGENE26605           | 16                                          | 16     | 2.6                      | 2.3           | GPI ethanolamine phosphate transferase 3 PIGO                        |
| AIPGENE15461           | 18                                          | 18     | 1.8                      | 1.9           | Dolichyl-phosphate beta-glucosyltransferase ALG5                     |
| AIPGENE4856            | 110                                         | 90     | 3.2                      | 1.8           | Protein transport protein Sec24C                                     |
| <b>AIPGENE6178</b>     | 48                                          | 49     | 1.9                      | 1.8           | Dolichyl-diphosphooligosaccharide--protein glycosyltransferase STT3B |
| AIPGENE2497            | 56                                          | 53     | 1.9                      | 1.6           | Protein transport protein Sec23A                                     |
| AIPGENE27679           | 93                                          | 97     | 1.5                      | 1.2           | Protein transport protein Sec24B                                     |
| <b>AIPGENE16</b>       | 60                                          | 21     | 3.4                      | 1.1           | Alpha-1,3-gucosyltransferase ALG6                                    |

<sup>a</sup> Ordered by SymGas/ApoGas.

<sup>b</sup> Genes potentially involved in N-linked glycosylation are highlighted.

<sup>c</sup> Numbers are rounded to two significant digits.

**Table S4 Module 2 genes involved in food digestion**

| Gene ID <sup>a,b</sup> | Average expression level (TPM) <sup>c</sup> |        | Fold change <sup>c</sup> |               | Annotation                        |
|------------------------|---------------------------------------------|--------|--------------------------|---------------|-----------------------------------|
|                        | ApoEpi                                      | ApoGas | ApoEpi/SymEpi            | ApoGas/SymGas |                                   |
| AIPGENE9704            | 6.8                                         | 35     | 8.2                      | 58            | Chymotrypsinogen B                |
| AIPGENE25876           | 290                                         | 1500   | 32                       | 55            | Chymotrypsin B                    |
| <b>AIPGENE15455</b>    | 98                                          | 400    | 12                       | 51            | Chitinase 3                       |
| AIPGENE2028            | 35                                          | 150    | 8.1                      | 48            | Trypsin-3                         |
| AIPGENE8235            | 71                                          | 380    | 15                       | 35            | Anionic trypsin                   |
| <b>AIPGENE23293</b>    | 200                                         | 740    | 13                       | 27            | Acidic mammalian chitinase        |
| AIPGENE24288           | 59                                          | 210    | 2.6                      | 21            | Chymotrypsin-like protease CTRL-1 |
| AIPGENE1364            | 77                                          | 180    | 3.9                      | 19            | Meprin A subunit beta MEP1B       |
| AIPGENE2734            | 22                                          | 93     | 11                       | 17            | Chymotrypsinogen B                |
| <b>AIPGENE28200</b>    | 30                                          | 85     | 8.1                      | 16            | Acidic mammalian chitinase        |
| AIPGENE2019            | 10                                          | 36     | 4.3                      | 15            | Trypsin-3                         |
| AIPGENE23157           | 9.3                                         | 27     | 3.3                      | 13            | Chymotrypsinogen B                |
| <b>AIPGENE28199</b>    | 14                                          | 22     | 5.2                      | 12            | Acidic mammalian chitinase        |
| <b>AIPGENE7785</b>     | 24                                          | 74     | 6.8                      | 9.8           | Chitinase 3                       |
| AIPGENE17423           | 8.7                                         | 24     | 3.1                      | 9.6           | Maltase-glucoamylase MGAM         |
| AIPGENE26805           | 10                                          | 35     | 3.2                      | 9.1           | Chymotrypsinogen B                |
| AIPGENE24686           | 17                                          | 18     | 1.0                      | 3.1           | Beta-hexosaminidase HEX           |
| AIPGENE6698            | 52                                          | 63     | 1.7                      | 2.9           | Chymotrypsinogen B2               |

<sup>a</sup> Ordered by ApoGas/SymGas.

<sup>b</sup> Genes encoding putative chitinases are highlighted; they should allow digestion of a major exoskeletal component of most cnidarian prey animals.

<sup>c</sup> Numbers are rounded to two significant digits.

**Table S5 Module 3 genes involved in lysosomal/symbiosomal organization**

| Gene ID <sup>a,b</sup> | Average expression level (TPM) <sup>c</sup> |        | Fold change <sup>c</sup> |               | Annotation                                                                 |
|------------------------|---------------------------------------------|--------|--------------------------|---------------|----------------------------------------------------------------------------|
|                        | ApoGas                                      | SymGas | SymGas/SymEpi            | SymGas/ApoGas |                                                                            |
| <b>AIPGENE18610</b>    | 17                                          | 840    | 18                       | 50            | Sulfated glycoprotein 1                                                    |
| AIPGENE20198           | 1.3                                         | 42     | 13                       | 32            | Sulfotransferase 1C2A                                                      |
| AIPGENE762             | 10                                          | 160    | 8.0                      | 15            | Phospholipase B-like 2                                                     |
| AIPGENE8500            | 14                                          | 110    | 10                       | 8.3           | Gamma-glutamyl hydrolase                                                   |
| AIPGENE756             | 12                                          | 90     | 5.3                      | 7.5           | Phospholipase B-like 2                                                     |
| AIPGENE8201            | 19                                          | 120    | 5.2                      | 6.6           | Gamma-glutamyl hydrolase                                                   |
| AIPGENE9365            | 19                                          | 120    | 4.3                      | 6.4           | Beta-glucuronidase                                                         |
| AIPGENE9310            | 78                                          | 490    | 7.2                      | 6.3           | E3 ubiquitin-protein ligase MARCH1                                         |
| AIPGENE17332           | 42                                          | 230    | 3.2                      | 5.7           | Regulatory-associated protein of mTOR                                      |
| AIPGENE12986           | 14                                          | 78     | 4.1                      | 5.6           | Bcl-2-like protein 1                                                       |
| AIPGENE2358            | 21                                          | 110    | 8.2                      | 5.3           | Deleted in malignant brain tumors 1 protein DMBT1                          |
| AIPGENE17384           | 34                                          | 170    | 4.4                      | 4.9           | Regulatory-associated protein of mTOR                                      |
| <b>AIPGENE1615</b>     | 9.3                                         | 45     | 5.1                      | 4.9           | Vacuolar protein sorting-associated protein 4B                             |
| AIPGENE13031           | 11                                          | 51     | 3.3                      | 4.5           | Alpha-N-acetylgalactosaminidase                                            |
| AIPGENE9338            | 25                                          | 93     | 3.8                      | 3.8           | Beta-glucuronidase                                                         |
| AIPGENE23106           | 45                                          | 170    | 3.0                      | 3.7           | Legumain                                                                   |
| AIPGENE10665           | 33                                          | 100    | 5.9                      | 3.1           | Sulfotransferase 1C2A                                                      |
| AIPGENE8377            | 29                                          | 84     | 2.7                      | 2.9           | Sorting nexin-13                                                           |
| <b>AIPGENE11822</b>    | 33                                          | 89     | 3.3                      | 2.7           | AP-5                                                                       |
| <b>AIPGENE16722</b>    | 26                                          | 62     | 2.0                      | 2.4           | Lysosomal thioesterase PPT2-A                                              |
| AIPGENE1266            | 25                                          | 59     | 2.8                      | 2.4           | Somatomedin-B and thrombospondin type-1 domain-containing protein          |
| AIPGENE14910           | 31                                          | 66     | 9.1                      | 2.1           | Basement membrane-specific heparan sulfate proteoglycan core protein HSPG2 |
| AIPGENE25198           | 75                                          | 149    | 1.8                      | 2.0           | PTB domain-containing engulfment adapter protein 1                         |
| AIPGENE13027           | 46                                          | 87     | 2.3                      | 1.9           | Alpha-N-acetylgalactosaminidase                                            |



|              |    |     |     |     |                                                 |
|--------------|----|-----|-----|-----|-------------------------------------------------|
| AIPGENE23952 | 6  | 113 | 3.2 | 1.8 | Nischarin                                       |
| AIPGENE27709 | 32 | 60  | 1.5 | 1.8 | Lysosome membrane protein 2 SCARB2              |
| AIPGENE5637  | 28 | 50  | 2.5 | 1.8 | Phospholipase B-like 1                          |
| AIPGENE1792  | 18 | 31  | 2.1 | 1.7 | Chitinase domain-containing protein 1           |
| AIPGENE17107 | 25 | 41  | 1.7 | 1.6 | Vacuolar protein sorting-associated protein 33A |
| AIPGENE1844  | 43 | 69  | 3.1 | 1.6 | Steryl-sulfatase                                |
| AIPGENE20604 | 27 | 42  | 1.7 | 1.6 | H(+)/Cl(-) exchange transporter 7               |

<sup>a</sup> Ordered by SymGas/ApoGas.

<sup>b</sup> Some genes encoding lysosomal marker proteins are highlighted.

<sup>c</sup> Numbers are rounded to two significant digits.

**Table S6 Module 3 genes involved in sugar transport**

| Gene ID <sup>a,b</sup> | Average expression level (TPM) <sup>c</sup> |        | Fold change <sup>c</sup> |               | Annotation                                                               |
|------------------------|---------------------------------------------|--------|--------------------------|---------------|--------------------------------------------------------------------------|
|                        | SymEpi                                      | SymGas | SymGas/SymEpi            | SymGas/ApoGas |                                                                          |
| AIPGENE18406           | 10                                          | 70     | 7.8                      | 6.9           | Facilitated glucose transporter GLUT8                                    |
| AIPGENE27196           | 23                                          | 140    | 9.9                      | 6.2           | Solute carrier family 23 member 2 SLC23A2                                |
| AIPGENE2706            | 5.0                                         | 21     | 9.5                      | 4.7           | Solute carrier family 2, facilitated glucose transporter member 8 SLC2A8 |
| AIPGENE6170            | 8.0                                         | 19     | 2.0                      | 2.5           | Solute carrier family 2, facilitated glucose transporter member 8 SLC2A8 |
| AIPGENE12097           | 23                                          | 49     | 1.6                      | 2.2           | Solute carrier family 2, facilitated glucose transporter member 1 SLC2A1 |

<sup>a</sup> Ordered by SymGas/ApoGas.

<sup>b</sup> Gray highlight, genes encoding glucose transporters that are investigated further in this study; yellow highlight, genes encoding putative glucose transporters that are upregulated in symbiotic gastrodermal cells but not investigated further in this study.

<sup>c</sup> Numbers are rounded to two significant digits.

**Table S7 Module 3 genes involved in sterol transport and homeostasis**

| Gene ID <sup>a,b</sup> | Average expression level (TPM) <sup>c</sup> |        | Fold change <sup>c</sup> |               | Annotation                                             |
|------------------------|---------------------------------------------|--------|--------------------------|---------------|--------------------------------------------------------|
|                        | ApoGas                                      | SymGas | SymGas/SymEpi            | SymGas/ApoGas |                                                        |
| AIPGENE23673           | 3.7                                         | 70     | 15                       | 19            | Lathosterol oxidase                                    |
| AIPGENE2187            | 24                                          | 390    | 9.9                      | 16            | Low-density lipoprotein receptor-related protein 6     |
| <b>AIPGENE3074</b>     | 46                                          | 460    | 13                       | 10            | Protein NPC2                                           |
| AIPGENE15716           | 45                                          | 330    | 4.9                      | 7.3           | Pro-low-density lipoprotein receptor-related protein 1 |
| AIPGENE13786           | 71                                          | 450    | 4.4                      | 6.3           | Lipid storage droplets surface-binding protein 2       |
| AIPGENE12169           | 8.6                                         | 49     | 4.0                      | 5.7           | Low density lipoprotein receptor adapter protein 1     |
| AIPGENE23723           | 850                                         | 4000   | 8.5                      | 4.7           | Apolipoporphins                                        |
| AIPGENE20806           | 23                                          | 60     | 2.2                      | 2.6           | Hormone-sensitive lipase                               |
| AIPGENE7350            | 22                                          | 44     | 4.3                      | 2.0           | Long-chain-fatty-acid--CoA ligase 5                    |
| AIPGENE23362           | 190                                         | 280    | 1.9                      | 1.5           | Sterol regulatory element-binding protein 1            |
| AIPGENE23053           | 31                                          | 34     | 1.4                      | 1.1           | Non-specific lipid-transfer protein SCP2               |

<sup>a</sup> Ordered by SymGas/ApoGas.

<sup>b</sup> A cholesterol-transport protein previously characterized in *Aiptasia* and other cnidarians is highlighted.

<sup>c</sup> Numbers are rounded to two significant digits.

**Table S8 Module 4 genes involved in digestion**

| Gene ID <sup>a,b</sup> | Average expression level (TPM) <sup>c</sup> |        | Fold change <sup>c</sup> |               | Annotation                                  |
|------------------------|---------------------------------------------|--------|--------------------------|---------------|---------------------------------------------|
|                        | ApoGas                                      | SymGas | ApoGas/ApoEpi            | SymGas/SymEpi |                                             |
| <b>AIPGENE21470</b>    | 190                                         | 380    | 2.4                      | 6.7           | Proactivator polypeptide                    |
| AIPGENE18552           | 92                                          | 89     | 2.1                      | 6.4           | Acetylcholinesterase                        |
| AIPGENE27509           | 65                                          | 99     | 1.8                      | 4.6           | Betaine--homocysteine S-methyltransferase 1 |
| <b>AIPGENE26157</b>    | 680                                         | 350    | 2.8                      | 4.1           | Cathepsin L                                 |
| <b>AIPGENE16849</b>    | 170                                         | 180    | 2.1                      | 3.5           | Cathepsin B                                 |
| AIPGENE10977           | 23                                          | 21     | 2.2                      | 3.3           | Betaine--homocysteine S-methyltransferase 1 |
| <b>AIPGENE203</b>      | 20                                          | 21     | 2.1                      | 3.2           | Tripeptidyl-peptidase 1                     |
| AIPGENE4319            | 21                                          | 9.3    | 2.2                      | 3.0           | Arylsulfatase B                             |
| AIPGENE27525           | 40                                          | 43     | 1.6                      | 3.0           | Betaine--homocysteine S-methyltransferase 1 |
| AIPGENE20697           | 40                                          | 56     | 1.0                      | 2.9           | Betaine--homocysteine S-methyltransferase 1 |
| <b>AIPGENE25614</b>    | 10                                          | 11     | 2.1                      | 2.6           | Lysosome membrane protein 2                 |
| <b>AIPGENE7709</b>     | 29                                          | 18     | 2.8                      | 2.4           | E3 ubiquitin-protein ligase MIB1            |
| <b>AIPGENE14803</b>    | 28                                          | 15     | 2.7                      | 2.3           | E3 ubiquitin-protein ligase MIB1            |
| <b>AIPGENE462</b>      | 11                                          | 8.5    | 1.2                      | 2.2           | Chymotrypsinogen B                          |
| AIPGENE28006           | 30                                          | 22     | 2.2                      | 2.0           | Alpha-N-acetylglucosaminidase               |
| AIPGENE19389           | 29                                          | 25     | 2.1                      | 1.8           | N-acylethanolamine-hydrolyzing acid amidase |
| AIPGENE28710           | 41                                          | 39     | 2.4                      | 1.7           | Arylsulfatase B                             |
| <b>AIPGENE20962</b>    | 110                                         | 89     | 1.5                      | 1.5           | Lysosomal-trafficking regulator             |
| AIPGENE28230           | 24                                          | 5.4    | 3.7                      | 1.3           | Sulfotransferase 1C2A                       |

<sup>a</sup> Ordered by SymGas/SymEpi.

<sup>b</sup> Genes potentially involved in protein degradation are highlighted.

<sup>c</sup> Numbers are rounded to two significant digits.

**Table S9 Module 5 genes involved in cnidocyte function**

| Gene ID <sup>a,b</sup> | Average expression level (TPM) <sup>c</sup> |        | Fold change <sup>c</sup> |               | Annotation                     |
|------------------------|---------------------------------------------|--------|--------------------------|---------------|--------------------------------|
|                        | ApoEpi                                      | SymEpi | ApoEpi/ApoGas            | SymEpi/SymGas |                                |
| <b>AIPGENE23882</b>    | 10                                          | 9.0    | 5.7                      | 90            | Nematocyte expressed protein 6 |
| AIPGENE21874           | 11                                          | 35     | 11                       | 19            | Equinatoxin-2                  |
| AIPGENE3089            | 15                                          | 39     | 3.8                      | 15            | Toxin PsTX-60B                 |
| AIPGENE8715            | 12                                          | 37     | 8.0                      | 15            | Toxin CfTX-2                   |
| <b>AIPGENE5924</b>     | 63                                          | 320    | 2.6                      | 10            | minicollagen 1                 |
| AIPGENE3166            | 19                                          | 44     | 6.3                      | 9.8           | Toxin AvTX-60A                 |
| <b>AIPGENE11611</b>    | 58                                          | 190    | 2.9                      | 8.1           | Nematocyst outer wall antigen  |
| AIPGENE4696            | 45                                          | 69     | 37                       | 8.1           | Phospholipase A2               |
| <b>AIPGENE13265</b>    | 46                                          | 76     | 2.9                      | 6.3           | Nematocyte expressed protein 6 |
| AIPGENE17670           | 9.6                                         | 30     | 5.8                      | 4.3           | Toxin CaTX-A                   |
| AIPGENE3053            | 15                                          | 13     | 2.4                      | 4.2           | Toxin AvTX-60A                 |
| AIPGENE17675           | 8.5                                         | 47     | 2.2                      | 3.7           | Toxin CaTX-A                   |
| AIPGENE19223           | 6.3                                         | 6.8    | 2.8                      | 3.4           | Toxin CaTX-A                   |

<sup>a</sup> Ordered by SymEpi/SymGas.

<sup>b</sup> Four previously well characterized nematocyte markers are highlighted; two of them are shown in Fig. 1G.

<sup>c</sup> Numbers are rounded to two significant digits.

**Table S10 Module 5 genes involved in responses to mechanical stimuli**

| Gene ID <sup>a,b</sup> | Average expression level (TPM) <sup>c</sup> |        | Fold change <sup>c</sup> |               | Annotation                                                             |
|------------------------|---------------------------------------------|--------|--------------------------|---------------|------------------------------------------------------------------------|
|                        | ApoEpi                                      | SymEpi | ApoEpi/ApoGas            | SymEpi/SymGas |                                                                        |
| AIPGENE6717            | 20                                          | 55     | 2.8                      | 15            | Amyloid beta A4                                                        |
| AIPGENE26233           | 54                                          | 67     | 3.2                      | 7.5           | Tetraspan membrane protein of hair cell stereocilia                    |
| <b>AIPGENE7279</b>     | 130                                         | 190    | 6.9                      | 7.2           | Nephrocystin-3                                                         |
| AIPGENE727             | 21                                          | 13     | 3.6                      | 6.9           | Acid-sensing ion channel 3                                             |
| AIPGENE13869           | 48                                          | 300    | 3.0                      | 6.2           | YadA domain protein                                                    |
| AIPGENE16071           | 15                                          | 14     | 5.2                      | 5.2           | Acid-sensing ion channel 3                                             |
| <b>AIPGENE7259</b>     | 58                                          | 58     | 5.1                      | 4.8           | Nephrocystin-3                                                         |
| <b>AIPGENE7280</b>     | 31                                          | 43     | 3.5                      | 4.7           | Nephrocystin-3                                                         |
| <b>AIPGENE7264</b>     | 150                                         | 120    | 2.5                      | 4.4           | Nephrocystin-3                                                         |
| <b>AIPGENE10398</b>    | 44                                          | 40     | 4.7                      | 4.1           | Nephrocystin-3                                                         |
| AIPGENE18522           | 12                                          | 11     | 3.3                      | 3.7           | Acid-sensing ion channel 3                                             |
| AIPGENE7455            | 7.1                                         | 6.5    | 3.2                      | 3.6           | Acid-sensing ion channel 3                                             |
| AIPGENE565             | 44                                          | 12     | 6.6                      | 3.2           | Transient receptor potential cation channel subfamily A member 1 TRPA1 |
| <b>AIPGENE3114</b>     | 20                                          | 28     | 5.5                      | 3.2           | Nephrocystin-3                                                         |
| <b>AIPGENE3223</b>     | 78                                          | 75     | 8.1                      | 3.0           | Nephrocystin-3                                                         |
| AIPGENE13728           | 29                                          | 26     | 5.8                      | 2.7           | Transient receptor potential cation channel subfamily A member 1 TRPA1 |
| <b>AIPGENE4254</b>     | 43                                          | 54     | 2.5                      | 2.3           | Nephrocystin-3                                                         |
| AIPGENE1377            | 34                                          | 32     | 1.2                      | 2.0           | Acid-sensing ion channel 3                                             |
| <b>AIPGENE15296</b>    | 20                                          | 18     | 2.5                      | 2.0           | Nephrocystin-3                                                         |
| <b>AIPGENE20487</b>    | 350                                         | 270    | 1.9                      | 1.3           | Nephrocystin-3                                                         |
| <b>AIPGENE20323</b>    | 79                                          | 59     | 2.0                      | 1.2           | Nephrocystin-3                                                         |

<sup>a</sup> Ordered by SymEpi/SymGas.

<sup>b</sup> Genes potentially required for normal ciliary development and function are highlighted.

<sup>c</sup> Numbers are rounded to two significant digits.

**Table S11 Potential cnidocyte marker genes in Cluster 11**

| Gene ID <sup>a,b</sup> | Fold change <sup>c</sup> | Adjusted <i>p</i> value | Annotation                             |
|------------------------|--------------------------|-------------------------|----------------------------------------|
| AIPGENE5924            | 37                       | 5E-25                   | Minicollagen 1                         |
| AIPGENE23847           | 20                       | 3E-18                   | Minicollagen 2                         |
| AIPGENE25615           | 14                       | 7E-40                   | Venom prothrombin activator omicarin-C |
| AIPGENE11170           | 7.4                      | 3E-12                   | Latrophilin-3                          |
| AIPGENE11611           | 6.1                      | 9E-33                   | Nematocyst outer wall antigen          |
| AIPGENE29070           | 5.5                      | 1E-05                   | Matrilin-2                             |
| AIPGENE25580           | 5.0                      | 9E-88                   | Lactadherin OS=Rattus norvegicus       |
| AIPGENE2293            | 3.7                      | 9E-88                   | D-galactoside-specific lectin          |
| AIPGENE23596           | 2.0                      | 6E-49                   | L-rhamnose-binding lectin CSL1         |

<sup>a</sup> Ordered by Fold change.

<sup>b</sup> Genes shown in Fig. 1G are highlighted.

<sup>c</sup> Fold-changes calculated by comparing the cells in Cluster 11 with all the other cells.

**Table S12 Potential gastrodermal-cell marker genes in Cluster 2, 7, and/or 10**

| Cluster | Gene ID <sup>a,b</sup> | Fold change <sup>c</sup> | Adjusted <i>p</i> value | Annotation                          |
|---------|------------------------|--------------------------|-------------------------|-------------------------------------|
| 2       | AIPGENE21625           | 2.5                      | 1E-18                   | Titin                               |
| 2       | AIPGENE3988            | 2.0                      | 4E-05                   | Tropomyosin                         |
| 7       | AIPGENE6165            | 8.2                      | 5E-22                   | Integrin alpha-8                    |
| 7       | AIPGENE23790           | 6.0                      | 3E-60                   | Integrin beta-6                     |
| 7       | AIPGENE27486           | 5.5                      | 4E-21                   | Tropomyosin alpha-4                 |
| 7       | AIPGENE23262           | 4.5                      | 6E-56                   | Fibroblast growth factor receptor 1 |
| 7       | AIPGENE5861            | 4.5                      | 2E-18                   | Integrin beta-2                     |
| 7       | AIPGENE22443           | 3.7                      | 1E-28                   | Soma ferritin                       |
| 7       | AIPGENE21255           | 3.7                      | 2E-12                   | Integrin alpha-4                    |
| 7       | AIPGENE16019           | 3.0                      | 4E-22                   | Fibroblast growth factor receptor 3 |
| 7       | AIPGENE8440            | 2.7                      | 1E-11                   | Integrin alpha-6                    |
| 7       | AIPGENE15963           | 2.5                      | 1E-11                   | Laminin beta-1                      |
| 7       | AIPGENE17012           | 2.2                      | 3E-12                   | Laminin alpha-4                     |
| 7       | AIPGENE6003            | 2.0                      | 4E-07                   | Cathepsin L                         |
| 7       | AIPGENE26156           | 2.0                      | 5E-17                   | Cathepsin L                         |
| 7       | AIPGENE2368            | 2.0                      | 5E-06                   | Laminin gamma-1                     |
| 10      | AIPGENE3975            | 5.5                      | 1E-25                   | Fibroblast growth factor receptor   |
| 10      | AIPGENE22204           | 3.7                      | 3E-23                   | Cathepsin B                         |
| 10      | AIPGENE23262           | 2.5                      | 7E-11                   | Fibroblast growth factor receptor 1 |
| 10      | AIPGENE26157           | 2.2                      | 7E-13                   | Cathepsin L                         |

<sup>a</sup> Ordered by Fold change within each cluster.

<sup>b</sup> Potential marker genes were selected according to cell markers identified in other cnidarian species.

<sup>c</sup> Fold-changes calculated by comparing the cells in Cluster 2, 7, or 10 with all the other cells.



**Table S13 Cluster 10 marker genes associated with lysosomal organization and function**

| Gene ID <sup>a</sup> | Fold change <sup>b</sup> | Adjusted <i>p</i> value | Annotation                                         |
|----------------------|--------------------------|-------------------------|----------------------------------------------------|
| AIPGENE22204         | 3.7                      | 3E-23                   | Cathepsin B                                        |
| AIPGENE21470         | 3.3                      | 3E-16                   | Proactivator polypeptide                           |
| AIPGENE5531          | 3.3                      | 3E-21                   | Niemann-Pick C1 NPC1                               |
| AIPGENE721           | 3.0                      | 6E-11                   | Sialate O-acetyltransferase                        |
| AIPGENE19216         | 2.5                      | 2E-23                   | Acid ceramidase                                    |
| AIPGENE1519          | 2.5                      | 5E-19                   | Tyrosine-protein kinase SRC42A                     |
| AIPGENE9971          | 2.5                      | 2E-19                   | Lysosomal aspartic protease                        |
| AIPGENE26157         | 2.2                      | 7E-13                   | Cathepsin L                                        |
| AIPGENE22539         | 2.2                      | 1E-05                   | Epididymal secretory protein NPC2                  |
| AIPGENE3899          | 2.0                      | 2E-11                   | CD63 antigen                                       |
| AIPGENE756           | 2.0                      | 4E-30                   | Putative phospholipase B-like 2                    |
| AIPGENE5532          | 2.0                      | 3E-07                   | Niemann-Pick C1 NPC1                               |
| AIPGENE18432         | 2.0                      | 4E-21                   | Low-density lipoprotein receptor-related protein 6 |

<sup>a</sup> Ordered by Fold change.

<sup>b</sup> Fold-changes calculated by comparing the cells in Cluster 10 with all the other cells.

**Table S14 Cluster 10 marker genes associated with glucose transport and its positive regulation**

| Gene ID <sup>a,b</sup> | Fold change <sup>c</sup> | Adjusted <i>p</i> value | Annotation                                                        |
|------------------------|--------------------------|-------------------------|-------------------------------------------------------------------|
| AIPGENE12082           | 1.8                      | 4E-24                   | Solute carrier family 2, facilitated glucose transporter member 1 |
| AIPGENE10547           | 1.5                      | 2E-25                   | C2 domain-containing protein 5                                    |
| AIPGENE10700           | 1.3                      | 4E-04                   | Bifunctional protein NCOAT                                        |

<sup>a</sup> Ordered by Fold change.

<sup>b</sup> Gray highlight, the gene encoding glucose transporter AipGLUT1 $\alpha$ , as investigated further in this study.

<sup>c</sup> Fold-changes calculated by comparing the cells in Cluster 10 with all the other cells.

**Table S15 Cluster 10 marker genes associated with cholesterol transport and homeostasis**

| <b>Gene ID<sup>a</sup></b> | <b>Fold change<sup>b</sup></b> | <b>Adjusted <i>p</i> value</b> | <b>Annotation</b>                                  |
|----------------------------|--------------------------------|--------------------------------|----------------------------------------------------|
| AIPGENE5531                | 3.3                            | 3E-21                          | Niemann-Pick C1 NPC1                               |
| AIPGENE22539               | 2.2                            | 9E-06                          | Epididymal secretory protein NPC2                  |
| AIPGENE5532                | 2.0                            | 3E-07                          | Niemann-Pick C1 NPC1                               |
| AIPGENE18432               | 2.0                            | 4E-21                          | Low-density lipoprotein receptor-related protein 6 |

<sup>a</sup> Ordered by Fold change.

<sup>b</sup> Fold-changes calculated by comparing the cells in Cluster 10 with all the other cells.

**Table S16 Cluster 7 marker genes associated with extracellular matrix, cell adhesion, and cell-cell signaling**

| Gene ID <sup>a</sup> | Fold change <sup>b</sup> | Adjusted <i>p</i> value | Annotation                                                        |
|----------------------|--------------------------|-------------------------|-------------------------------------------------------------------|
| AIPGENE10422         | 18                       | 1E-85                   | Collagen alpha-1(IV) chain                                        |
| AIPGENE10546         | 11                       | 4E-65                   | Collagen alpha-2(IV) chain                                        |
| AIPGENE8588          | 9.0                      | 2E-60                   | Testican-2                                                        |
| AIPGENE1266          | 8.2                      | 6E-28                   | Somatomedin-B and thrombospondin type-1 domain-containing protein |
| AIPGENE6165          | 8.2                      | 5E-22                   | Integrin alpha-8                                                  |
| AIPGENE27343         | 7.4                      | 2E-46                   | Collagen alpha-4(VI) chain                                        |
| AIPGENE23790         | 6.0                      | 3E-60                   | Integrin beta-6                                                   |
| AIPGENE2489          | 6.0                      | 6E-34                   | Matrilin-2                                                        |
| AIPGENE3595          | 5.5                      | 1E-32                   | Serotransferrin                                                   |
| AIPGENE9466          | 5.5                      | 8E-16                   | Fibroblast growth factor 18                                       |
| AIPGENE7597          | 5.0                      | 7E-46                   | Zonadhesin                                                        |
| AIPGENE1737          | 5.0                      | 6E-44                   | Protein Wnt                                                       |
| AIPGENE23312         | 5.0                      | 1E-39                   | Hemicentin-1                                                      |
| AIPGENE12342         | 5.0                      | 4E-28                   | Collagen alpha-3(VI) chain                                        |
| AIPGENE22492         | 5.0                      | 7E-37                   | Glypican-6                                                        |
| AIPGENE7897          | 5.0                      | 2E-15                   | Hemicentin-1                                                      |
| AIPGENE23262         | 4.5                      | 6E-56                   | Fibroblast growth factor receptor 1                               |
| AIPGENE17918         | 4.5                      | 2E-16                   | Hemicentin-2                                                      |
| AIPGENE10250         | 4.5                      | 6E-21                   | Collagen alpha-6(VI) chain                                        |
| AIPGENE20628         | 4.5                      | 6E-47                   | Collagen alpha-4(VI) chain                                        |
| AIPGENE23383         | 4.1                      | 5E-38                   | Hemicentin-2                                                      |
| AIPGENE29129         | 4.1                      | 6E-40                   | Periostin                                                         |
| AIPGENE6975          | 4.1                      | 8E-43                   | Neurofascin                                                       |
| AIPGENE16436         | 4.1                      | 5E-53                   | Protocadherin Fat 1                                               |
| AIPGENE27342         | 4.1                      | 2E-07                   | Agrin                                                             |
| AIPGENE11184         | 4.1                      | 3E-16                   | Collagen alpha-1(VII) chain                                       |
| AIPGENE17222         | 3.7                      | 3E-29                   | Agrin                                                             |
| AIPGENE25153         | 3.7                      | 6E-24                   | Collagen alpha-5(VI) chain                                        |
| AIPGENE10561         | 3.7                      | 4E-17                   | Collagen alpha-1(XXVI) chain                                      |
| AIPGENE21255         | 3.7                      | 2E-12                   | Integrin alpha-4                                                  |
| AIPGENE12362         | 3.3                      | 8E-08                   | Collagen alpha-6(VI) chain                                        |
| AIPGENE20627         | 3.3                      | 3E-09                   | Collagen alpha-3(VI) chain                                        |
| AIPGENE7612          | 3.3                      | 2E-26                   | Reticulocyte-binding protein 2 homolog a                          |
| AIPGENE8011          | 3.0                      | 5E-15                   | SCO-spondin                                                       |
| AIPGENE16749         | 3.0                      | 3E-11                   | Talin-2                                                           |
| AIPGENE18950         | 3.0                      | 1E-06                   | Metastasis suppressor protein 1                                   |
| AIPGENE3608          | 3.0                      | 3E-07                   | Receptor-type tyrosine-protein phosphatase delta                  |
| AIPGENE12347         | 3.0                      | 7E-15                   | Collagen alpha-6(VI) chain                                        |
| AIPGENE266           | 3.0                      | 1E-10                   | Dystroglycan                                                      |

|              |     |       |                                               |
|--------------|-----|-------|-----------------------------------------------|
| AIPGENE23512 | 3.0 | 1E-06 | Protein Wnt-4                                 |
| AIPGENE3034  | 2.7 | 2E-24 | Mammalian ependymin-related protein 1         |
| AIPGENE8440  | 2.7 | 1E-11 | Integrin alpha-6                              |
| AIPGENE29194 | 2.7 | 3E-14 | Catenin delta-2                               |
| AIPGENE4075  | 2.5 | 4E-14 | Proprotein convertase subtilisin/kexin type 5 |
| AIPGENE15963 | 2.5 | 1E-11 | Laminin subunit beta-1                        |
| AIPGENE14892 | 2.5 | 9E-16 | Calsyntenin-2                                 |
| AIPGENE26184 | 2.5 | 7E-11 | Fibrillin-1                                   |
| AIPGENE9673  | 2.5 | 6E-10 | Fibulin-1                                     |
| AIPGENE22521 | 2.2 | 9E-10 | Glypican-1                                    |
| AIPGENE25192 | 2.2 | 8E-22 | Collagen alpha-1(XXIV) chain                  |
| AIPGENE15522 | 2.2 | 2E-06 | Protocadherin Fat 1                           |
| AIPGENE17012 | 2.2 | 3E-12 | Laminin subunit alpha-4                       |
| AIPGENE19606 | 2.2 | 2E-05 | Thrombospondin-1                              |
| AIPGENE18534 | 2.2 | 1E-20 | Collagen alpha-2(I) chain                     |
| AIPGENE5847  | 2.2 | 8E-07 | Semaphorin-5A                                 |
| AIPGENE25893 | 2.2 | 3E-11 | Collagen alpha-1(XXVII) chain B               |
| AIPGENE8276  | 2.0 | 2E-08 | Myosin-10                                     |
| AIPGENE18348 | 2.0 | 4E-05 | Fibrillin-1                                   |
| AIPGENE8376  | 2.0 | 6E-12 | Collagen alpha-2(I) chain                     |
| AIPGENE2639  | 2.0 | 5E-06 | Afadin                                        |
| AIPGENE6961  | 2.0 | 2E-10 | Neurofascin                                   |
| AIPGENE2368  | 2.0 | 5E-06 | Laminin subunit gamma-1                       |

---

<sup>a</sup> Ordered by Fold change.

<sup>b</sup> Fold-changes calculated by comparing the cells in Cluster 7 with all the other cells.

**Table S17 Expression patterns of the five major glucose and ammonium transporters**

| Gene <sup>a</sup>                | Average expression level (TPM) <sup>b</sup> |        | Fold change <sup>b</sup> |               |
|----------------------------------|---------------------------------------------|--------|--------------------------|---------------|
|                                  | SymEpi                                      | SymGas | SymEpi/ApoEpi            | SymGas/ApoGas |
| AipSLC2A8 $\alpha$ (AIPGENE2706) | 2.2                                         | 21     | 0.84                     | 4.7           |
| AipGLUT1 $\alpha$ (AIPGENE12082) | 33                                          | 174    | 0.67                     | 1.0           |
| AipGLUT8 $\alpha$ (AIPGENE18406) | 8.9                                         | 70     | 2.1                      | 6.8           |
| AipRhBG1(AIPGENE18105)           | 20                                          | 410    | 6.8                      | 170           |
| AipAMT1 (AIPGENE17420)           | 98                                          | 25     | 1.1                      | 1.4           |

<sup>a</sup> Genes are listed in the order in which they are shown in Figure 2 A, B, and E – S.

<sup>b</sup> Numbers are rounded to two significant digits.

**Table S18 Peptides used as antigens to generate custom antibodies**

| Target ID                        | Peptide sequence <sup>a,b</sup> |
|----------------------------------|---------------------------------|
| AipAMT1 (AIPGENE17420)           | NGGSQGSASKGDA                   |
| AipRhBG1 (AIPGENE18105)          | IDQESGHSINSIKS                  |
| AipSLC2A8 $\alpha$ (AIPGENE2706) | ALLGGPLGGWLIEAFGRKGG            |
| AipGLUT1 $\alpha$ (AIPGENE12082) | NSPEKVIKDYYKKYGHEFTD            |
| AipGLUT8 $\alpha$ (AIPGENE18406) | PDMDIDFEIA                      |

<sup>a</sup> Peptides were selected from non-transmembrane regions with high predicted antigenicity and hydrophilicity.

<sup>b</sup> An additional cysteine was added to either the N- or C-terminus of each peptide to facilitate its conjugation to keyhole-limpet hemocyanin to create the antigens used for immunization.

**Table S19 Expression levels of genes associated with “nitrogen-metabolism pathway” (KEGG Ko00910) in Aiptasia**

| Gene ID <sup>a,b</sup> | TPM |            |      | Annotation                             |
|------------------------|-----|------------|------|----------------------------------------|
|                        | Apo | Apo + Gluc | Sym  |                                        |
| AIPGENE510             | 360 | 240        | 300  | Cystathionine gamma-lyase              |
| AIPGENE17420           | 26  | 360        | 270  | Putative ammonium transporter 1        |
| AIPGENE26763           | 60  | 310        | 244  | Glutamine synthetase                   |
| AIPGENE24026           | 10  | 140        | 170  | Glutamate dehydrogenase                |
| AIPGENE18105           | 3.1 | 4.2        | 94   | Ammonium transporter Rh type B         |
| AIPGENE26078           | 7.7 | 47         | 68   | Putative glutamate synthase [NADPH]    |
| AIPGENE5302            | 86  | 51         | 56   | Carbonic anhydrase 2                   |
| AIPGENE17478           | 25  | 50         | 48   | Asparagine synthetase                  |
| AIPGENE28157           | 25  | 37         | 37   | Carbamoyl-phosphate synthase           |
| AIPGENE2960            | 190 | 140        | 35   | Carbonic anhydrase 2                   |
| AIPGENE21724           | 35  | 48         | 33   | Omega-amidase NIT2                     |
| AIPGENE10420           | 24  | 31         | 31   | Carbonic anhydrase 7                   |
| AIPGENE659             | 19  | 22         | 25   | vWA domain-containing protein 8        |
| AIPGENE19720           | 40  | 18         | 19   | Carbonic anhydrase 2                   |
| AIPGENE3776            | 28  | 19         | 17   | Glutamate dehydrogenase, mitochondrial |
| AIPGENE19710           | 17  | 33         | 15   | Carbonic anhydrase-related protein 10  |
| AIPGENE7282            | 15  | 18         | 13   | Ammonium transporter Rh type B         |
| AIPGENE27618           | 28  | 10         | 9.8  | Glutamate dehydrogenase                |
| AIPGENE529             | 11  | 7.3        | 8.9  | Cystathionine gamma-lyase              |
| AIPGENE17792           | 15  | 6.6        | 8.7  | Histidine ammonia-lyase                |
| AIPGENE19737           | 1.6 | 2.6        | 5.4  | Carbonic anhydrase 2                   |
| AIPGENE15516           | 2.7 | 3.6        | 4.8  | Putative ammonium transporter 3        |
| AIPGENE16683           | 5.3 | 3.2        | 3.5  | Putative ammonium transporter 3        |
| AIPGENE27316           | 3   | 4.4        | 2.8  | Asparagine synthetase                  |
| AIPGENE15200           | 2.2 | 1.5        | 2.6  | Putative ammonium transporter 3        |
| AIPGENE878             | 2.8 | 7.4        | 1.9  | Tryptophanase                          |
| AIPGENE19694           | 3.4 | 8          | 1.8  | Carbonic anhydrase 2                   |
| AIPGENE16631           | 1.5 | 0.36       | 0.76 | Putative ammonium transporter 3        |

<sup>a</sup> Ordered by expression level (TPM) in Sym

<sup>b</sup> Genes marked in Fig. 3B are highlighted in yellow



**Table S20 Primers used to amplify the transporter genes**

| Target ID                           | Gene size | Forward primer                   | Reverse primer                    |
|-------------------------------------|-----------|----------------------------------|-----------------------------------|
| AipAMT1<br>(AIPGENE17420)           | 1443 bp   | atgatgaacgtaactacagaacagac       | ttacaattttcatcaagagctccgtg        |
| AipRhBG1<br>(AIPGENE18105)          | 1501 bp   | atgtgctcggcaatcataacaacacgc      | ttaatcactcttgatggaattgatggaatgtcc |
| AipSLC2A8 $\alpha$<br>(AIPGENE2706) | 1431 bp   | GCTAGCatggccaataaaatattcaaagtagc | GGATCCttatatgcgttcatattcag        |
| AipGLUT1 $\alpha$<br>(AIPGENE12082) | 1470 bp   | GCTAGCatggaggaggaaaagggggagac    | GGATCCttaatcatcgtccccaacagaac     |
| AipGLUT8 $\alpha$<br>(AIPGENE18406) | 1476 bp   | GCTAGCatgaatcgttcattactcaagcg    | GGATCCttaagtctgctttctacctctgc     |

Sequences in uppercase indicate the enzyme-cutting sites for *NheI* (Forward primer) and *BamHI* (Reverse primer), used in cloning the amplified products into plasmid pSH100 (see text). Gene-specific-primer sequences are in lowercase. No enzyme-cutting sites were added for the ammonium-transporter genes, as they were cloned using a TA-cloning protocol.

**Data S1 Tissue-specific transcriptomic profiles of *Aiptasia* in different symbiotic states.** Gene-expression levels are reported as transcripts per million (TPM). Apo, aposymbiotic; Sym, symbiotic; Epi, epidermis; Gas, gastrodermis.

**Data S2 Differentially expressed genes identified from multi-factor analysis.** Numbers represent z-scores calculated based on gene-expression levels (TPM). Modules were assigned using hierarchical clustering. Apo, aposymbiotic; Sym, symbiotic; Epi, epidermis; Gas, gastrodermis.

**Data S3 Potential cell-type markers identified in single-cell RNA-seq.**

**Data S4 Gene-set-enrichment analysis of identified Cluster 10 marker genes.**

**Data S5 Gene-set-enrichment analysis of identified Cluster 7 marker genes.**
